# Supplementary material
Source: PubMed Central journal article supplement (PMC6994124)

1 **Supplemental Figure 1: Specificity of tetramers with HCV-derived epitopes.**  
2 Representative dot plots of **(A)** PBMCs of healthy donors stained with HCV-tetramer and **(B)**  
3 HCV-infected patients stained with either HCV-Tetramer (upper panel) or with control (CLIP)  
4 - tetramer (lower panel).

5

6 **Supplemental Figure 2: Comprehensive presentation of HCV-specific CD4 T cell**  
7 **responses.** Pseudocolor plots of all 29 patients with detectable responses at baseline.  
8 Responses from baseline and W2 are displayed. \* = No Week 2 time point available, End of  
9 treatment depicted. The data of P3 are also presented in Figure 2 and 3, of P15 in Figure 2,  
10 of P16 and P17 in Figure 4, of P19 in Figure 3.

11

12 **Supplemental Figure 3: Genotypes, HLA-types and tetramer responses at baseline.** Pie  
13 Charts of all analyzed patients. Each Pie represents a group of patients, either having HLA  
14 DRB1\*01:01 or DRB1\*15:01, or Genotype 1 or Genotype 2/3, respectively. The blue color  
15 depicts the percentage of patients with detectable HCV-specific CD4 T cells at baseline.

16

17 **Supplemental Figure 4: Viral load and amino transferase levels of patients undergoing**  
18 **DAA therapy. (A)** Viral load and **(B)** alanine transaminase (ALT)-levels were determined  
19 from each patient at each time point. Each symbol represents 1 patient, bars represent  
20 medians; \*\*  $p < 0.01$ , \*\*\*\*  $p < 0.0001$ ; non-parametric distribution with Wilcoxon matched-  
21 pairs signed rank test between indicated groups. Due to multiple comparisons ( $n=3$ ),  
22 significance level was adjusted using Bonferroni correction and  $p$  values of  $< 0.01$  were  
23 considered statistically significant. Thus,  $p$  values  $> 0.01$  are not indicated.

24

25 **Supplemental Figure 5: Cytokine production of HCV-specific CD4 T cells.** PBMCs were  
26 stained with tetramer, enriched, stimulated for 3.5 h with PMA/ionomycin and stained with  
27 antibodies and analyzed for cytokine expression. **(A)** Representative dot plots are shown for  
28 two representative patients and each analyzed cytokine and **(B)** for all patients in the  
29 corresponding bar charts. **(C)** Multicytokine expression of IL-21, IFN, TNF and IL-2 was  
30 analyzed by SPICE. The analyzed cytokines are depicted as arcs in red hues and the  
31 multicytokine expression as blue pies. Each symbol represents 1 patient, bars represent  
32 medians; non-parametric distribution with Wilcoxon matched-pairs signed rank test with  
33 statistical significance level of 0.05 was adjusted using Bonferroni correction between  
34 indicated groups.

35

36 **Supplemental Figure 6: CD127 and Tcf1 expression on HCV-specific CD4 T cells and**  
37 **bulk non-naïve CD4 T cells.** Expression of CD127 **(A)** and Tcf1 **(B)** on HCV-specific CD4 T  
38 cells (corresponding to data shown in Figure 3) and non-naïve CD4 T cells was assessed at  
39 the indicated time points before and during antiviral therapy. The median fluorescence  
40 intensity (MFI) of the individual samples and the median MFI are displayed as white  
41 scattered dots and green bars, respectively (n = 20 for CD127; n = 8 for Tcf1). Non-  
42 parametric distribution with Wilcoxon matched-pairs signed rank test with statistical  
43 significance level of 0.05 was adjusted using Bonferroni correction between indicated groups.  
44 # each bulk time point is significantly different from each HCV-specific time point ( $p < 0,0005$ )

45

46 **Supplemental Figure 7: Phenotypic shift of HCV-specific CD4 T cells after initiation of**  
47 **antiviral therapy.** t-Distributed Stochastic Neighbor Embedding (tSNE) analysis of CD4 T  
48 cells based on polychromatic flow cytometry data including CCR6, CCR7, CXCR3, CXCR5,  
49 CD25, CD45RA, CD127, ICOS, OX40 and PD-1 was performed in longitudinal samples from  
50 three patients analyzed in a individual batches. Localization of bulk Tfh cells (CXCR5+PD-  
51 1+, dark blue) and bulk Th1 cells (CXCR5-CXCR3+CCR6-, powder blue) were assessed on

52 the tSNE map. HCV-specific CD4 T cells (red) were visualized on the tSNE map per time  
53 point analyzed, indicating phenotypic changes in high dimensional space of the virus-specific  
54 CD4 T cell response after initiation of treatment.

55

56 **Supplemental Figure 8: HCV-specific CD4 T cells shift from a Th1 to a cTfh phenotype.**

57 Differentially expressed genes between Th1 cells and bulk cTfh cells from all time points  
58 (Baseline, W2, FU) were used to generate a gene set of 297 genes. The heat maps were  
59 generated using this gene set in longitudinal samples (Baseline, W2, FU) to analyze changes  
60 of HCV-specific CD4 T cells. Cutoff for generation of the heat maps was FDR < 0.05.

61 **Supplemental Table 1: Patient characteristics.** w = weeks; nT = no Tetramer positive cells; (x) = Tetramer response, but not used for  
62 phenotyping; DCV = Daclastavir; SOF = Sofosbuvir; LPV = Ledipasvir; VEL= Velpatasvir; OBV = Ombitasvir; PTV = Paritaprevir; r = Ritonavir;  
63 DSV = Dasabuvir; RBV = Ribavirin; GRZ = Grazoprevir; ELB = Elbasvir; GLE = Glecaprevir; PIB = Pibrentasvir; VOX = Voxilaprevir. All patients  
64 achieved SVR12.

| Patient | Age | Genotype | relevant HLA | Therapy                     | SVR12 | Tetramer Staining | nABs | CXCL13 ELISA |
|---------|-----|----------|--------------|-----------------------------|-------|-------------------|------|--------------|
| P1      | 52y | 1a       | DRB1*01:01   | LPV/SOF (8w)                | yes   | x                 | x    |              |
| P2      | 67y | 1b       | DRB1*01:01   | SOF/DCV (16W)               | yes   | x                 | x    | x            |
| P3      | 67y | 1b       | DRB1*15:01   | LPV/SOF + RBV (12W)         | yes   | x                 | x    |              |
| P4      | 55y | 1b       | DRB1*15:01   | LPV/SOF + RBV (12W)         | yes   | x                 | x    | x            |
| P5      | 48y | 3a       | DRB1*15:01   | SOF/VEL (12W)               | yes   | x                 |      | x            |
| P6      | 41y | 1b       | DRB1*15:01   | OBV/PTV/r + DSV (12W)       | yes   | x                 | x    |              |
| P7      | 59y | 1        | DRB1*15:01   | LPV/SOF + RBV (12W)         | yes   | x                 |      |              |
| P8      | 43y | 1a       | DRB1*15:01   | LPV/SOF (12W)               | yes   | x                 |      |              |
| P9      | 46y | 1a       | DRB1*15:01   | LPV/SOF (12W)               | yes   | x                 |      |              |
| P10     | 59y | 1a       | DRB1 *15     | LPV/SOF + RBV (12W)         | yes   | x                 | x    | x            |
| P11     | 64y | 1a       | DRB1*15:01   | LPV/SOF + RBV (12W)         | yes   | x                 | x    | x            |
| P12     | 58y | 1b       | DRB1*15:01   | GRZ/ELB (12W)               | yes   | x                 |      | x            |
| P13     | 42y | 3a       | DRB1*15:01   | SOF/DCV (12W)               | yes   | x                 |      | x            |
| P14     | 48y | 1b       | DRB1*15:01   | LPV/SOF (8W)                | yes   | x                 |      | x            |
| P15     | 47y | 3a       | DRB1*01:01   | SOF/VEL + RBV (12W)         | yes   | x                 |      |              |
| P16     | 44y | 1b       | DRB1*15:01   | GLE/PIB (8w)                | yes   | x                 |      |              |
| P17     | 55y | 3a       | DRB1*01:01   | SOF/DCV + RBV (24W)         | yes   | x                 | x    |              |
| P18     | 36y | 3a       | DRB1*01:01   | SOF/VEL (12W)               | yes   | x                 |      |              |
| P19     | 73y | 1b       | DRB1*15:01   | GRZ/ELB (12W)               | yes   | x                 |      |              |
| P20     | 36y | 2b       | DRB1*01:01   | SOF + RBV (12W)             | yes   | x                 | x    |              |
| P21     | 42y | 1a       | DRB1*15:01   | OBV/PTV/r + DSV + RBV (24W) | yes   | nT                | x    |              |
| P22     | 55y | 1b       | DBR1*15:01   | LPV/SOF (8w)                | yes   | nT                |      |              |
| P23     | 44y | 1        | DRB1*01:01   | LPV/SOF + RBV (12W)         | yes   | nT                | x    | x            |

|     |     |    |            |                             |     |     |   |   |
|-----|-----|----|------------|-----------------------------|-----|-----|---|---|
| P24 | 57y | 1b | DRB1*15:01 | OBV/PTV/r + DSV + RBV (12W) | yes | nT  | x | x |
| P25 | 51y | 1a | DRB1*01:01 | GLE/PIB (8w)                | yes | nT  |   |   |
| P26 | 63y | 3a | DRB1 *01   | SOF/VEL/VOX (12W)           | yes | nT  |   |   |
| P27 | 57y | 3a | DRB1*01:01 | SOF/DCV (12W)               | yes | nT  |   | x |
| P28 | 19y | 1a | DRB1*01:01 | GLE/PIB (8w)                | yes | nT  |   |   |
| P29 | 49y | 1a | DRB1*15:01 | LPV/SOF (12W)               | yes | nT  | x |   |
| P30 | 55y | 1a | DRB1*15:01 | LPV/SOF (12W)               | yes | (x) | x | x |
| P31 | 78y | 1b | DRB1*15:01 | GLE/PIB (8w)                | yes | x   |   |   |
| P32 | 62y | 2b | DRB1*01:01 | SOF + RBV (12W)             | yes | x   |   |   |
| P33 | 36y | 1  | DRB1*15:01 | OBV/PTV/r + DSV (12W)       | yes | x   |   |   |
| P34 | 61y | 1a | DRB1*15:01 | GRZ/ELB (12W)               | yes | x   |   |   |
| P35 | 58y | 1  | DRB1*01:01 | LPV/SOF + RBV (24W)         | yes | x   | x |   |
| P36 | 24y | 1b | DRB1*15:01 | LPV/SOF (12W)               | yes | x   |   |   |
| P37 | 55y | 1a | DRB1*15:01 | GLE/PIB (8w)                | yes | x   |   |   |
| P38 | 45y | 1a | DRB1*15:01 | LPV/SOF (12W)               | yes | x   |   |   |
| P39 | 50y | 1b | DRB1*15:01 | OBV/PTV/r + DSV + RBV (12W) | yes | x   | x |   |
| P40 | 68y | 1a | DRB1*15:01 | LPV/SOF (8w)                | yes | nT  |   |   |
| P41 | 57y | 1b | DRB1*01:01 | LPV/SOF + RBV (12W)         | yes | nT  |   |   |
| P42 | 62y | 2c | DRB1*01:01 | GLE/PIB (8w)                | yes | nT  |   |   |
| P43 | 44y | 3  | DRB1*01:01 | GLE/PIB (8w)                | yes | nT  |   |   |
| P44 | 55y | 1a | DRB1*01:01 | LPV/SOF (12W)               | yes | nT  |   |   |
| P45 | 41y | 3a |            | SOF/DCV (12W)               | yes |     | x | x |
| P46 | 71y | 1  |            | LPV/SOF + RBV (24W)         | yes |     | x |   |
| P47 | 42y | 1b |            | LPV/SOF (8w)                | yes |     | x |   |
| P48 | 59y | 1b |            | OBV/PTV/r + DSV + RBV (12W) | yes |     | x |   |
| P49 | 35y | 1b |            | LPV/SOF (8w)                | yes |     | x |   |
| P50 | 49y | 1a |            | LPV/SOF (12W)               | yes |     | x | x |
| P51 | 77y | 1b |            | LPV/SOF (12W)               | yes |     | x | x |
| P52 | 48y | 1b |            | LPV/SOF (8w)                | yes |     | x |   |
| P53 | 31y | 1b |            | LPV/SOF (8w)                | yes |     | x |   |
| P54 | 58y | 3a |            | SOF + RBV (24W)             | yes |     | x | x |
| P55 | 61y | 3a |            | LPV/SOF + RBV (24W)         | yes |     | x |   |
| P56 | 40y | 1b |            | GRZ/ELB (12W)               | yes |     |   | x |

|     |     |    |  |                      |     |  |   |   |
|-----|-----|----|--|----------------------|-----|--|---|---|
| P57 | 56y | 1b |  | LPV/SOF (12W)        | yes |  | x |   |
| P58 | 60y | 3a |  | SOF/VEL (12W)        | yes |  |   | x |
| P59 | 51y | 1a |  | LPV/SOF (12W)        | yes |  | x |   |
| P60 | 61y | 1b |  | LPV/SOF (12W)        | yes |  | x |   |
| P61 | 20y | 1b |  | LPV/SOF (8w)         | yes |  | x |   |
| P62 | 34y | 1b |  | LPV/SOF (8w)         | yes |  | x |   |
| P63 | 64y | 1a |  | LPV/SOF + RBV (12W)  | yes |  | x |   |
| P64 | 47y | 1a |  | LPV/SOF (12W)        | yes |  | x |   |
| P65 | 59y | 1b |  | LPV/SOF (8w)         | yes |  | x |   |
| P66 | 28y | 1b |  | LPV/SOF (8w)         | yes |  | x |   |
| P67 | 56y | 1b |  | LPV/SOF (8w)         | yes |  | x |   |
| P68 | 75y | 1b |  | GRZ/ELB (12W)        | yes |  |   | x |
| P69 | 59y | 1a |  | SOF/VEL (12W)        | yes |  |   | x |
| P70 | 32y | 3a |  | GLE/PIB (8w)         | yes |  |   | x |
| P71 | 32y | 1a |  | LPV/SOF (8w)         | yes |  |   | x |
| P72 | 67y | 1b |  | OBV/PTV/r + DSV (8w) | yes |  |   | x |
| P73 | 56y | 3a |  | SOF/VEL (12W)        | yes |  |   | x |
| P74 | 46y | 1a |  | LPV/SOF (12W)        | yes |  |   | x |
| P75 | 42y | 3a |  | SOF/VEL (12W)        | yes |  |   | x |
| P76 | 50y | 3a |  | SOF/VEL (12W)        | yes |  |   | x |

65

66

67 **Supplemental Table 2: Used Tetramers.** Tetramers were purchased from MBL, Woburn,  
 68 United States.

| HLA molecule | Protein  | Position     | Sequence         |
|--------------|----------|--------------|------------------|
| DRB1*01:01   | HCV-NS4B | aa 1806–1818 | TLLFNILGGWVAA    |
| DRB1*15:01   | HCV-NS3  | aa 1411–1425 | GINAVAYYRGLDVSV  |
| DRB1*15:01   | HCV-NS3  | aa 1582–1597 | NFPYLVAYQATVCARA |
| DRB1*15:01   | CLIP     |              | PVSKMRMATPLLMQA  |

69

70

71 **Supplemental Table 3: Antibodies.**

| Antigen               | Fluorophore   | Clone      | Provider      | Staining                        |
|-----------------------|---------------|------------|---------------|---------------------------------|
| CD4                   | FITC          | RPA-T4     | BD Bioscience | extracellular                   |
| CXCR5                 | BV421         | RF8B2      | BD Bioscience | extracellular                   |
| CD127                 | BV510         | HIL-7R-M21 | BD Bioscience | extracellular                   |
| CCR6                  | BV605         | 11A9       | BD Bioscience | extracellular                   |
| PD-1                  | BV786         | EH12.1     | BD Bioscience | extracellular                   |
| OX40                  | PE-Cy7        | ACT-35     | BD Bioscience | extracellular                   |
| CCR7                  | BUV395        | 150503     | BD Bioscience | extracellular                   |
| CD4                   | BV510         | SK3        | BD Bioscience | extracellular/<br>intracellular |
| CD45RA                | BV711         | HI100      | BD Bioscience | extracellular                   |
| CTLA-4                | BV421         | BNI3       | BD Bioscience | extracellular                   |
| CD39                  | BUV395        | TU66       | BD Bioscience | extracellular                   |
| CD38                  | BUV737        | HB7        | BD Bioscience | extracellular                   |
| CD45RA                | PerCP-Cy5.5   | HI100      | eBioscience   | extracellular                   |
| ICOS                  | APC           | ISA-3      | eBioscience   | extracellular                   |
| CD14                  | APC-eFluor780 | 61D3       | eBioscience   | extracellular                   |
| CD19                  | APC-eFluor780 | HIB19      | eBioscience   | extracellular                   |
| fixable viability dye | APC-eFluor780 |            | eBioscience   | extracellular                   |
| TIGIT                 | PE-Cy7        | MBSA43     | eBioscience   | extracellular                   |
| CD25                  | BV650         | BC96       | Biolegend     | extracellular                   |
| CXCR3                 | BV711         | G025H7     | Biolegend     | extracellular                   |
| CCR7                  | AlexaFluor488 | G043H7     | Biolegend     | extracellular                   |
| CD305                 | PerCP-Cy5.5   | NKTA255    | Biolegend     | extracellular                   |
| BTLA                  | APC           | MIH26      | Biolegend     | extracellular                   |
| IL-2                  | BV605         | MQ1-17H12  | BD Bioscience | intracellular                   |
| IL-21                 | AlexaFluor647 | 3A3-N2.1   | BD Bioscience | intracellular                   |
| TNF                   | PE-Cy7        | MAb11      | BD Bioscience | intracellular                   |
| IFN $\gamma$          | FITC          | 25723.11   | BD Bioscience | intracellular                   |
| TCF-1                 | AlexaFluor647 | 7F11A10    | Biolegend     | Intranuclear                    |
| KI-67                 | PE-Cy7        | KI-67      | Biolegend     | intranuclear                    |

72

73 **Supplemental Table 4: Differentially expressed genes between bulk cTfh and bulk Th1**  
 74 **cells with FDR < 0.05.** RNAseq-based genes differentially expressed between bulk Th1 cells  
 75 (defined as CXCR3+CCR6-) and Tfh cells (defined as CXCR5+PD-1+CXCR3-) from all time  
 76 points of three individual patients. Cutoff was FDR < 0.05.

|                    | padj     | name          | type                 |
|--------------------|----------|---------------|----------------------|
| ENSG00000186810,7  | 2,10E-88 | CXCR3         | protein_coding       |
| ENSG00000073861,2  | 1,80E-23 | TBX21         | protein_coding       |
| ENSG00000007264,9  | 3,08E-18 | MATK          | protein_coding       |
| ENSG00000145220,9  | 7,10E-18 | LYAR          | protein_coding       |
| ENSG00000115607,5  | 1,07E-11 | IL18RAP       | protein_coding       |
| ENSG00000115956,9  | 1,20E-11 | PLEK          | protein_coding       |
| ENSG00000240535,4  | 1,20E-11 | CTD-2313F11,1 | processed_transcript |
| ENSG00000196549,6  | 1,22E-10 | MME           | protein_coding       |
| ENSG00000115687,9  | 2,69E-10 | PASK          | protein_coding       |
| ENSG00000163629,8  | 1,34E-09 | PTPN13        | protein_coding       |
| ENSG00000137501,12 | 1,36E-09 | SYTL2         | protein_coding       |
| ENSG00000020633,14 | 3,95E-09 | RUNX3         | protein_coding       |
| ENSG00000078304,15 | 4,88E-09 | PPP2R5C       | protein_coding       |
| ENSG00000026297,11 | 6,15E-09 | RNASET2       | protein_coding       |
| ENSG00000151883,12 | 1,31E-08 | PARP8         | protein_coding       |
| ENSG00000198915,7  | 1,31E-08 | RASGEF1A      | protein_coding       |
| ENSG00000185046,14 | 2,18E-08 | ANKS1B        | protein_coding       |
| ENSG00000077984,4  | 1,79E-07 | CST7          | protein_coding       |
| ENSG00000169756,12 | 1,84E-07 | LIMS1         | protein_coding       |
| ENSG00000169252,4  | 4,78E-07 | ADRB2         | protein_coding       |
| ENSG00000240954,1  | 4,78E-07 | RPL4P1        | pseudogene           |
| ENSG00000181847,7  | 5,92E-07 | TIGIT         | protein_coding       |
| ENSG00000256069,3  | 6,16E-07 | A2MP1         | pseudogene           |
| ENSG00000124564,13 | 6,83E-07 | SLC17A3       | protein_coding       |
| ENSG00000118503,10 | 6,83E-07 | TNFAIP3       | protein_coding       |
| ENSG00000116574,4  | 6,94E-07 | RHOA          | protein_coding       |
| ENSG00000227036,2  | 7,41E-07 | LINC00511     | lincRNA              |
| ENSG00000178573,6  | 7,51E-07 | MAF           | protein_coding       |
| ENSG00000171435,9  | 8,39E-07 | KSR2          | protein_coding       |
| ENSG00000176083,13 | 1,10E-06 | ZNF683        | protein_coding       |
| ENSG00000026025,9  | 2,08E-06 | VIM           | protein_coding       |
| ENSG00000111796,3  | 2,20E-06 | KLRB1         | protein_coding       |
| ENSG00000167094,11 | 2,64E-06 | TTC16         | protein_coding       |
| ENSG00000066468,16 | 2,91E-06 | FGFR2         | protein_coding       |
| ENSG00000235532,1  | 3,46E-06 | LINC00402     | lincRNA              |



|                    |             |               |                      |
|--------------------|-------------|---------------|----------------------|
| ENSG00000154451,10 | 5,25E-06    | GBP5          | protein_coding       |
| ENSG00000139187,5  | 5,70E-06    | KLRG1         | protein_coding       |
| ENSG00000175899,10 | 8,06E-06    | A2M           | protein_coding       |
| ENSG00000228509,1  | 8,18E-06    | AC006460,2    | antisense            |
| ENSG00000125657,3  | 8,21E-06    | TNFSF9        | protein_coding       |
| ENSG00000260807,2  | 9,49E-06    | RP11-161M6,2  | lincRNA              |
| ENSG00000029534,15 | 1,09E-05    | ANK1          | protein_coding       |
| ENSG00000263466,1  | 1,16E-05    | RP1-56K13,2   | antisense            |
| ENSG00000261573,1  | 1,19E-05    | RP11-553K8,5  | antisense            |
| ENSG00000110651,7  | 2,11E-05    | CD81          | protein_coding       |
| ENSG00000176845,8  | 2,67E-05    | METRNL        | protein_coding       |
| ENSG00000237945,3  | 2,76E-05    | LINC00649     | antisense            |
| ENSG00000138386,12 | 2,79E-05    | NAB1          | protein_coding       |
| ENSG00000012048,15 | 2,79E-05    | BRCA1         | protein_coding       |
| ENSG00000169508,6  | 3,31E-05    | GPR183        | protein_coding       |
| ENSG00000160310,12 | 3,93E-05    | PRMT2         | protein_coding       |
| ENSG00000213071,6  | 4,79E-05    | LPAL2         | pseudogene           |
| ENSG00000227963,1  | 5,00E-05    | RP5-1074L1,1  | antisense            |
| ENSG00000235162,4  | 6,16E-05    | C12orf75      | protein_coding       |
| ENSG00000142669,9  | 9,59E-05    | SH3BGRL3      | protein_coding       |
| ENSG00000100298,11 | 0,000106075 | APOBEC3H      | protein_coding       |
| ENSG00000230266,1  | 0,000111029 | XXYL1-AS2     | antisense            |
| ENSG00000173585,11 | 0,000125997 | CCR9          | protein_coding       |
| ENSG00000109743,6  | 0,000125997 | BST1          | protein_coding       |
| ENSG00000145649,7  | 0,000129521 | GZMA          | protein_coding       |
| ENSG00000189067,8  | 0,000137871 | LITAF         | protein_coding       |
| ENSG00000102265,7  | 0,000140684 | TIMP1         | protein_coding       |
| ENSG00000143153,8  | 0,000141401 | ATP1B1        | protein_coding       |
| ENSG00000136111,8  | 0,000180723 | TBC1D4        | protein_coding       |
| ENSG00000213735,2  | 0,000184679 | ANAPC10P1     | pseudogene           |
| ENSG00000071539,9  | 0,000184679 | TRIP13        | protein_coding       |
| ENSG00000105963,9  | 0,000186149 | ADAP1         | protein_coding       |
| ENSG00000090104,7  | 0,000189643 | RGS1          | protein_coding       |
| ENSG00000026751,12 | 0,0002115   | SLAMF7        | protein_coding       |
| ENSG00000140859,11 | 0,000216659 | KIFC3         | protein_coding       |
| ENSG00000138378,13 | 0,000218289 | STAT4         | protein_coding       |
| ENSG00000107485,11 | 0,000238781 | GATA3         | protein_coding       |
| ENSG00000198650,6  | 0,000239754 | TAT           | protein_coding       |
| ENSG00000261390,1  | 0,00025532  | RP11-345M22,2 | lincRNA              |
| ENSG00000239713,3  | 0,000283393 | APOBEC3G      | protein_coding       |
| ENSG00000145819,11 | 0,000296581 | ARHGAP26      | protein_coding       |
| ENSG00000134107,4  | 0,000302882 | BHLHE40       | protein_coding       |
| ENSG00000249859,3  | 0,000315648 | PVT1          | processed_transcript |
| ENSG00000260905,1  | 0,000329126 | RP11-105C19,1 | lincRNA              |
| ENSG00000240065,3  | 0,000341061 | PSMB9         | protein_coding       |
| ENSG00000147533,12 | 0,000341061 | GOLGA7        | protein_coding       |

|                    |             |                  |                      |
|--------------------|-------------|------------------|----------------------|
| ENSG00000141401,7  | 0,00034904  | IMPA2            | protein_coding       |
| ENSG00000255733,1  | 0,000433768 | IFNG-AS1         | antisense            |
| ENSG00000205726,9  | 0,000447097 | ITSN1            | protein_coding       |
| ENSG00000218357,3  | 0,000493234 | LL22NC03-75H12,2 | protein_coding       |
| ENSG00000163508,8  | 0,000499351 | EOMES            | protein_coding       |
| ENSG00000135318,7  | 0,000499351 | NT5E             | protein_coding       |
| ENSG00000126264,5  | 0,000521324 | HCST             | protein_coding       |
| ENSG00000166681,9  | 0,000521324 | NGFRAP1          | protein_coding       |
| ENSG00000160932,6  | 0,000528143 | LY6E             | protein_coding       |
| ENSG00000239272,1  | 0,000528143 | RPL21P10         | pseudogene           |
| ENSG00000238164,2  | 0,000528589 | RP3-395M20,8     | processed_transcript |
| ENSG00000182383,8  | 0,000569235 | RPL27AP5         | pseudogene           |
| ENSG00000188522,10 | 0,000697487 | FAM83G           | protein_coding       |
| ENSG00000144290,12 | 0,000745593 | SLC4A10          | protein_coding       |
| ENSG00000002586,13 | 0,000799399 | CD99             | protein_coding       |
| ENSG00000197448,9  | 0,000818538 | GSTK1            | protein_coding       |
| ENSG00000213394,3  | 0,000957042 | RP4-747G18,5     | pseudogene           |
| ENSG00000182768,7  | 0,001015017 | NGRN             | protein_coding       |
| ENSG00000128791,7  | 0,001059431 | TWSG1            | protein_coding       |
| ENSG00000211898,3  | 0,001074202 | IGHD             | IG_C_gene            |
| ENSG00000226499,1  | 0,001122598 | RP5-882O7,1      | pseudogene           |
| ENSG00000231858,1  | 0,001236759 | AC067945,4       | processed_transcript |
| ENSG00000185920,11 | 0,001288745 | PTCH1            | protein_coding       |
| ENSG00000165949,8  | 0,001553137 | IFI27            | protein_coding       |
| ENSG00000138385,11 | 0,001589897 | SSB              | protein_coding       |
| ENSG00000228915,3  | 0,001726439 | OR7E128P         | pseudogene           |
| ENSG00000169398,15 | 0,001847027 | PTK2             | protein_coding       |
| ENSG00000153250,13 | 0,001968546 | RBMS1            | protein_coding       |
| ENSG00000168229,3  | 0,002150923 | PTGDR            | protein_coding       |
| ENSG00000184588,13 | 0,002433011 | PDE4B            | protein_coding       |
| ENSG00000143184,4  | 0,002433011 | XCL1             | protein_coding       |
| ENSG00000211697,2  | 0,002433011 | TRGV5            | TR_V_gene            |
| ENSG00000141232,4  | 0,002433011 | TOB1             | protein_coding       |
| ENSG00000185864,12 | 0,002618627 | NPIPBA           | protein_coding       |
| ENSG00000267986,1  | 0,002779713 | AC130469,2       | antisense            |
| ENSG00000185710,5  | 0,002931321 | RP11-645C24,2    | pseudogene           |
| ENSG00000167083,2  | 0,002931321 | GNGT2            | protein_coding       |
| ENSG00000232564,1  | 0,003298392 | RP4-591N18,2     | antisense            |
| ENSG00000260027,3  | 0,00334681  | HOXB7            | protein_coding       |
| ENSG00000182253,10 | 0,003581818 | SYNM             | protein_coding       |
| ENSG00000198846,5  | 0,003646208 | TOX              | protein_coding       |
| ENSG00000240463,1  | 0,003646208 | RPS19P3          | pseudogene           |
| ENSG00000213386,3  | 0,00373498  | RP11-779O18,2    | pseudogene           |
| ENSG00000268204,1  | 0,003880625 | CTD-3214H19,6    | antisense            |
| ENSG00000240219,1  | 0,003930347 | RP11-430C7,5     | lincRNA              |
| ENSG00000241490,1  | 0,004015289 | RP11-553L6,2     | antisense            |

|                    |             |                   |                      |
|--------------------|-------------|-------------------|----------------------|
| ENSG00000005249,8  | 0,004015289 | PRKAR2B           | protein_coding       |
| ENSG00000230747,1  | 0,004042364 | AC021188,4        | antisense            |
| ENSG00000170571,7  | 0,004098637 | EMB               | protein_coding       |
| ENSG00000160051,7  | 0,004402778 | IQCC              | protein_coding       |
| ENSG00000042493,11 | 0,004846058 | CAPG              | protein_coding       |
| ENSG00000129116,13 | 0,004888433 | PALLD             | protein_coding       |
| ENSG00000003147,13 | 0,004888433 | ICA1              | protein_coding       |
| ENSG00000168778,7  | 0,004936294 | TCTN2             | protein_coding       |
| ENSG00000116985,6  | 0,005023049 | BMP8B             | protein_coding       |
| ENSG00000140853,11 | 0,005023049 | NLRC5             | protein_coding       |
| ENSG00000243829,1  | 0,005023049 | CTB-33G10,1       | pseudogene           |
| ENSG00000131849,10 | 0,005023049 | ZNF132            | protein_coding       |
| ENSG00000108861,4  | 0,005336277 | DUSP3             | protein_coding       |
| ENSG00000170509,7  | 0,005653444 | HSD17B13          | protein_coding       |
| ENSG00000121621,6  | 0,006227827 | KIF18A            | protein_coding       |
| ENSG00000185442,8  | 0,006310393 | FAM174B           | protein_coding       |
| ENSG00000250151,5  | 0,006458475 | ARPC4-TTLL3       | protein_coding       |
| ENSG00000235781,1  | 0,006458475 | XXbac-BPG249D20,9 | antisense            |
| ENSG00000271886,1  | 0,006597077 | MIR98             | miRNA                |
| ENSG00000163612,10 | 0,007634216 | FAM86KP           | pseudogene           |
| ENSG00000197830,2  | 0,007634216 | AC011385,1        | pseudogene           |
| ENSG00000105472,8  | 0,007636275 | CLEC11A           | protein_coding       |
| ENSG00000259641,1  | 0,007727843 | RP11-279F6,3      | lincRNA              |
| ENSG00000183570,12 | 0,007810437 | PCBP3             | protein_coding       |
| ENSG00000008256,11 | 0,007900887 | CYTH3             | protein_coding       |
| ENSG00000152056,12 | 0,008267419 | AP1S3             | protein_coding       |
| ENSG00000227507,2  | 0,008267419 | LTB               | protein_coding       |
| ENSG00000254364,1  | 0,008267419 | KB-1615E4,3       | antisense            |
| ENSG00000184613,6  | 0,008267419 | NELL2             | protein_coding       |
| ENSG00000161791,9  | 0,008267419 | FMNL3             | protein_coding       |
| ENSG00000265500,1  | 0,008267419 | SEN3-EIF4A1       | processed_transcript |
| ENSG00000264745,1  | 0,008267419 | RP11-403A21,2     | antisense            |
| ENSG00000271554,1  | 0,008534246 | RP4-665N4,8       | antisense            |
| ENSG00000125384,6  | 0,008601131 | PTGER2            | protein_coding       |
| ENSG00000146540,10 | 0,008670895 | C7orf50           | protein_coding       |
| ENSG00000157985,13 | 0,008988052 | AGAP1             | protein_coding       |
| ENSG00000136738,10 | 0,008988052 | STAM              | protein_coding       |
| ENSG00000135362,9  | 0,008988052 | PRR5L             | protein_coding       |
| ENSG00000150457,7  | 0,009040023 | LATS2             | protein_coding       |
| ENSG00000238294,1  | 0,009082758 | snoU13            | snoRNA               |
| ENSG00000169896,12 | 0,009427611 | ITGAM             | protein_coding       |
| ENSG00000228169,3  | 0,009558169 | PPIAP19           | pseudogene           |
| ENSG00000183971,5  | 0,009558169 | NPW               | protein_coding       |
| ENSG00000272690,1  | 0,009896756 | RP11-803B1,8      | lincRNA              |
| ENSG00000106991,9  | 0,010267308 | ENG               | protein_coding       |
| ENSG00000177030,12 | 0,010782958 | DEAF1             | protein_coding       |

|                    |             |                |                      |
|--------------------|-------------|----------------|----------------------|
| ENSG00000188641,8  | 0,011111802 | DPYD           | protein_coding       |
| ENSG00000162174,8  | 0,011111802 | ASRGL1         | protein_coding       |
| ENSG00000235576,1  | 0,011244849 | AC092580,4     | lincRNA              |
| ENSG00000207741,1  | 0,01143046  | MIR590         | miRNA                |
| ENSG00000105953,10 | 0,011432382 | OGDH           | protein_coding       |
| ENSG00000228653,2  | 0,011996969 | HNRNPCP7       | pseudogene           |
| ENSG00000119632,3  | 0,012050423 | IFI27L2        | protein_coding       |
| ENSG00000168685,10 | 0,01279692  | IL7R           | protein_coding       |
| ENSG00000221714,2  | 0,01279692  | AC130352,1     | miRNA                |
| ENSG00000204220,5  | 0,012833888 | PFDN6          | protein_coding       |
| ENSG00000151651,11 | 0,012893964 | ADAM8          | protein_coding       |
| ENSG00000165929,8  | 0,012925507 | TC2N           | protein_coding       |
| ENSG00000233757,2  | 0,01329412  | AC092835,2     | lincRNA              |
| ENSG00000152380,5  | 0,01329412  | FAM151B        | protein_coding       |
| ENSG00000198208,7  | 0,013318993 | RPS6KL1        | protein_coding       |
| ENSG00000273218,1  | 0,013318993 | LLNLR-246C6,1  | lincRNA              |
| ENSG00000261008,2  | 0,013343645 | AC004158,2     | lincRNA              |
| ENSG00000065548,13 | 0,013682057 | ZC3H15         | protein_coding       |
| ENSG00000225986,1  | 0,014093423 | RP3-340N1,5    | antisense            |
| ENSG00000149557,8  | 0,014609848 | FEZ1           | protein_coding       |
| ENSG00000164086,8  | 0,015138301 | DUSP7          | protein_coding       |
| ENSG00000164687,6  | 0,015138301 | FABP5          | protein_coding       |
| ENSG00000172458,4  | 0,015138301 | IL17D          | protein_coding       |
| ENSG00000155090,10 | 0,015328074 | KLF10          | protein_coding       |
| ENSG00000115526,6  | 0,015644276 | CHST10         | protein_coding       |
| ENSG00000106605,6  | 0,015752728 | BLVRA          | protein_coding       |
| ENSG00000236790,1  | 0,01593652  | LINC00299      | lincRNA              |
| ENSG00000235522,2  | 0,016335021 | AC009505,2     | antisense            |
| ENSG00000260017,1  | 0,016335021 | RP11-1035H13,2 | antisense            |
| ENSG00000136810,8  | 0,016367336 | TXN            | protein_coding       |
| ENSG00000079277,15 | 0,017344558 | MKNK1          | protein_coding       |
| ENSG00000170819,4  | 0,018116025 | BFSP2          | protein_coding       |
| ENSG00000178075,15 | 0,019074308 | GRAMD1C        | protein_coding       |
| ENSG00000204272,6  | 0,02066744  | RP11-622K12,1  | processed_transcript |
| ENSG00000099860,4  | 0,020930121 | GADD45B        | protein_coding       |
| ENSG00000242100,2  | 0,020930121 | RPL9P32        | pseudogene           |
| ENSG00000251891,1  | 0,021213214 | RNU7-79P       | snRNA                |
| ENSG00000213963,2  | 0,021286413 | AC074286,1     | sense_overlapping    |
| ENSG00000232439,1  | 0,021543672 | RPL18AP7       | pseudogene           |
| ENSG00000211778,2  | 0,021604265 | TRAV4          | TR_V_gene            |
| ENSG00000227492,1  | 0,022353943 | RP11-316M21,6  | antisense            |
| ENSG00000115738,5  | 0,02269169  | ID2            | protein_coding       |
| ENSG00000106829,14 | 0,022735006 | TLE4           | protein_coding       |
| ENSG00000136104,14 | 0,022735006 | RNASEH2B       | protein_coding       |
| ENSG00000103550,9  | 0,022735006 | KNOP1          | protein_coding       |
| ENSG00000256222,1  | 0,022735006 | MTRNR2L3       | protein_coding       |

|                    |             |               |                      |
|--------------------|-------------|---------------|----------------------|
| ENSG00000182247,5  | 0,022894274 | UBE2E2        | protein_coding       |
| ENSG00000149260,10 | 0,023342468 | CAPN5         | protein_coding       |
| ENSG00000237805,1  | 0,023659247 | AC015849,2    | antisense            |
| ENSG00000196814,10 | 0,023823939 | MVB12B        | protein_coding       |
| ENSG00000158545,11 | 0,023917945 | ZC3H18        | protein_coding       |
| ENSG00000101294,12 | 0,024598496 | HM13          | protein_coding       |
| ENSG00000135845,5  | 0,025034058 | PIGC          | protein_coding       |
| ENSG00000135404,7  | 0,025036732 | CD63          | protein_coding       |
| ENSG00000071205,7  | 0,025284343 | ARHGAP10      | protein_coding       |
| ENSG00000104368,13 | 0,025644319 | PLAT          | protein_coding       |
| ENSG00000267041,1  | 0,025644319 | ZNF850        | protein_coding       |
| ENSG00000153283,8  | 0,025936837 | CD96          | protein_coding       |
| ENSG00000254206,1  | 0,025936837 | NPIP11        | protein_coding       |
| ENSG00000123146,15 | 0,025936837 | CD97          | protein_coding       |
| ENSG00000270024,1  | 0,026161802 | C8orf44-SGK3  | protein_coding       |
| ENSG00000169299,9  | 0,026439328 | PGM2          | protein_coding       |
| ENSG00000257800,1  | 0,026785245 | FNBP1P1       | pseudogene           |
| ENSG00000082074,11 | 0,027633712 | FYB           | protein_coding       |
| ENSG00000115271,6  | 0,027699532 | GCA           | protein_coding       |
| ENSG00000224856,2  | 0,02793534  | RP4-796I17,5  | pseudogene           |
| ENSG00000266240,1  | 0,027939103 | MIR5091       | miRNA                |
| ENSG00000080493,9  | 0,027954796 | SLC4A4        | protein_coding       |
| ENSG00000159339,9  | 0,028473142 | PADI4         | protein_coding       |
| ENSG00000159640,10 | 0,028614712 | ACE           | protein_coding       |
| ENSG00000231503,3  | 0,029010103 | PTMAP4        | pseudogene           |
| ENSG00000143198,8  | 0,029306297 | MGST3         | protein_coding       |
| ENSG00000126838,5  | 0,029482418 | PZP           | protein_coding       |
| ENSG00000269843,1  | 0,029497806 | CTC-490E21,10 | lincRNA              |
| ENSG00000100097,7  | 0,029558465 | LGALS1        | protein_coding       |
| ENSG00000175352,6  | 0,029823091 | NRIP3         | protein_coding       |
| ENSG00000232006,4  | 0,029934835 | AC005537,2    | processed_transcript |
| ENSG00000259932,1  | 0,030092204 | CTD-2651B20,7 | sense_intronic       |
| ENSG00000244733,4  | 0,030515139 | RP11-506M13,3 | lincRNA              |
| ENSG00000159648,7  | 0,031138318 | TEPP          | protein_coding       |
| ENSG00000224287,2  | 0,03239099  | MSL3P1        | pseudogene           |
| ENSG00000126709,10 | 0,033280724 | IFI6          | protein_coding       |
| ENSG00000143549,15 | 0,033281929 | TPM3          | protein_coding       |
| ENSG00000136770,6  | 0,033345609 | DNAJC1        | protein_coding       |
| ENSG00000234361,1  | 0,034983218 | RP11-52J3,3   | antisense            |
| ENSG00000196355,2  | 0,035665782 | AC021860,1    | protein_coding       |
| ENSG00000102908,16 | 0,03617965  | NFAT5         | protein_coding       |
| ENSG00000257698,1  | 0,036246862 | RP11-620J15,3 | lincRNA              |
| ENSG00000153885,10 | 0,036246862 | KCTD15        | protein_coding       |
| ENSG00000171791,10 | 0,036504173 | BCL2          | protein_coding       |
| ENSG00000168918,9  | 0,036571653 | INPP5D        | protein_coding       |
| ENSG00000122694,11 | 0,036571653 | GLIPR2        | protein_coding       |

|                    |             |               |                |
|--------------------|-------------|---------------|----------------|
| ENSG00000110324,5  | 0,036663944 | IL10RA        | protein_coding |
| ENSG00000198155,5  | 0,036712257 | ZNF876P       | pseudogene     |
| ENSG00000133962,3  | 0,038510644 | CATSPERB      | protein_coding |
| ENSG00000271913,1  | 0,038919415 | RP1-111C20,4  | antisense      |
| ENSG00000104154,5  | 0,03896442  | SLC30A4       | protein_coding |
| ENSG00000131899,6  | 0,03896442  | LLGL1         | protein_coding |
| ENSG00000272840,1  | 0,041082101 | RP11-379B18,6 | lincRNA        |
| ENSG00000129968,11 | 0,041496516 | ABHD17A       | protein_coding |
| ENSG00000074657,9  | 0,043229305 | ZNF532        | protein_coding |
| ENSG00000118307,14 | 0,043261518 | CASC1         | protein_coding |
| ENSG00000179820,11 | 0,043261518 | MYADM         | protein_coding |
| ENSG00000162426,10 | 0,043347748 | SLC45A1       | protein_coding |
| ENSG00000109787,8  | 0,04378842  | KLF3          | protein_coding |
| ENSG00000188215,5  | 0,04378842  | DCUN1D3       | protein_coding |
| ENSG00000266222,1  | 0,04378842  | RP11-433M22,1 | sense_intronic |
| ENSG00000100030,10 | 0,04386809  | MAPK1         | protein_coding |
| ENSG00000144214,5  | 0,04493736  | LYG1          | protein_coding |
| ENSG00000230037,1  | 0,04493736  | UBBP1         | pseudogene     |
| ENSG00000188451,7  | 0,04493736  | SRP72P2       | pseudogene     |
| ENSG00000258640,3  | 0,04493736  | RPL21P5       | pseudogene     |
| ENSG00000213967,6  | 0,04493736  | ZNF726        | protein_coding |
| ENSG00000131746,8  | 0,046644836 | TNS4          | protein_coding |
| ENSG00000211879,1  | 0,047649348 | TRAJ10        | TR_J_gene      |
| ENSG00000252835,1  | 0,047649348 | SCARNA21      | snoRNA         |
| ENSG00000223804,1  | 0,047661564 | RP6-206I17,1  | lincRNA        |
| ENSG00000089012,10 | 0,048195155 | SIRPG         | protein_coding |
| ENSG00000138758,7  | 0,048939068 | Sep 11        | protein_coding |
| ENSG00000222501,1  | 0,048939068 | RNU4-25P      | snRNA          |
| ENSG00000162843,13 | 0,049223976 | WDR64         | protein_coding |
| ENSG00000159618,11 | 0,049223976 | GPR114        | protein_coding |
| ENSG00000269680,1  | 0,049223976 | CTD-3128G10,6 | antisense      |
| ENSG00000211667,2  | 0,049223976 | IGLV3-12      | IG_V_gene      |

77

78

79 **Supplemental Table 5: Differentially expressed genes between bulk cTfh and HCV-**  
80 **specific CD4 T cells at baseline with FDR < 0.01.** RNAseq-based genes differentially  
81 expressed between HCV-specific CD4 T cells at baseline and Tfh cells (defined as  
82 CXCR5+PD-1+CXCR3-) from all time points of three individual patients. Cutoff was FDR <  
83 0.01.

|                    | padj     | name          | type           |
|--------------------|----------|---------------|----------------|
| ENSG00000188917.10 | 7,67E-26 | TRMT2B        | protein_coding |
| ENSG00000125657.3  | 8,59E-24 | TNFSF9        | protein_coding |
| ENSG00000211746.3  | 9,56E-18 | TRBV19        | TR_V_gene      |
| ENSG00000186810.7  | 5,46E-12 | CXCR3         | protein_coding |
| ENSG00000075336.7  | 3,95E-10 | TIMM21        | protein_coding |
| ENSG00000184005.9  | 4,63E-10 | ST6GALNAC3    | protein_coding |
| ENSG00000168096.10 | 7,16E-10 | ANKS3         | protein_coding |
| ENSG00000099821.9  | 1,67E-09 | POLRMT        | protein_coding |
| ENSG00000211817.2  | 3,24E-09 | TRAV38-2DV8   | TR_V_gene      |
| ENSG00000140688.12 | 4,15E-09 | C16orf58      | protein_coding |
| ENSG00000204789.3  | 9,38E-09 | ZNF204P       | pseudogene     |
| ENSG00000177669.3  | 1,70E-08 | MBOAT4        | protein_coding |
| ENSG00000167083.2  | 3,16E-08 | GNGT2         | protein_coding |
| ENSG00000171657.5  | 3,38E-08 | GPR82         | protein_coding |
| ENSG00000246898.1  | 3,76E-08 | LINC00920     | lincRNA        |
| ENSG00000267758.1  | 5,15E-08 | RP11-358B23.5 | antisense      |
| ENSG00000236514.1  | 1,16E-07 | RP11-162G10.5 | antisense      |
| ENSG00000134297.6  | 1,42E-07 | PLEKHA8P1     | pseudogene     |
| ENSG00000184619.3  | 1,44E-07 | KRBA2         | protein_coding |
| ENSG00000107443.11 | 1,50E-07 | CCNJ          | protein_coding |
| ENSG00000252128.1  | 1,76E-07 | SNORD27       | snoRNA         |
| ENSG00000137474.15 | 4,28E-07 | MYO7A         | protein_coding |
| ENSG00000183570.12 | 4,28E-07 | PCBP3         | protein_coding |
| ENSG00000234141.1  | 7,99E-07 | AC009473.1    | antisense      |
| ENSG00000164291.12 | 1,56E-06 | ARSK          | protein_coding |
| ENSG00000211778.2  | 2,58E-06 | TRAV4         | TR_V_gene      |
| ENSG00000149970.10 | 2,83E-06 | CNKSR2        | protein_coding |
| ENSG00000250889.2  | 3,00E-06 | RP11-229C3.2  | lincRNA        |
| ENSG00000096717.7  | 3,10E-06 | SIRT1         | protein_coding |
| ENSG00000211706.2  | 3,20E-06 | TRBV6-1       | TR_V_gene      |
| ENSG00000168243.6  | 3,28E-06 | GNG4          | protein_coding |
| ENSG00000175073.7  | 4,02E-06 | VCPIP1        | protein_coding |
| ENSG00000270164.1  | 5,35E-06 | AC006129.4    | lincRNA        |
| ENSG00000079385.17 | 5,35E-06 | CEACAM1       | protein_coding |
| ENSG00000126787.8  | 6,60E-06 | DLGAP5        | protein_coding |
| ENSG00000154803.8  | 8,60E-06 | FLCN          | protein_coding |
| ENSG00000071073.8  | 1,32E-05 | MGAT4A        | protein_coding |
| ENSG00000169508.6  | 1,72E-05 | GPR183        | protein_coding |
| ENSG00000252835.1  | 1,72E-05 | SCARNA21      | snoRNA         |
| ENSG00000241484.5  | 1,97E-05 | ARHGAP8       | protein_coding |
| ENSG00000260054.1  | 2,13E-05 | RP11-611L7.1  | lincRNA        |

|                    |             |               |                      |
|--------------------|-------------|---------------|----------------------|
| ENSG00000154217.10 | 2,69E-05    | PITPNC1       | protein_coding       |
| ENSG00000211797.2  | 2,78E-05    | TRAV17        | TR_V_gene            |
| ENSG00000211886.1  | 3,59E-05    | TRAJ3         | TR_J_gene            |
| ENSG00000178904.14 | 3,87E-05    | DPY19L3       | protein_coding       |
| ENSG00000182118.5  | 5,11E-05    | FAM89A        | protein_coding       |
| ENSG00000175449.9  | 5,32E-05    | RFESD         | protein_coding       |
| ENSG00000102878.11 | 5,32E-05    | HSF4          | protein_coding       |
| ENSG00000203497.2  | 5,32E-05    | PDCD4-AS1     | antisense            |
| ENSG00000101842.9  | 5,32E-05    | VSIG1         | protein_coding       |
| ENSG00000211796.1  | 5,43E-05    | TRAV16        | TR_V_gene            |
| ENSG00000239272.1  | 5,60E-05    | RPL21P10      | pseudogene           |
| ENSG00000185504.12 | 6,02E-05    | C17orf70      | protein_coding       |
| ENSG00000133069.10 | 6,41E-05    | TMCC2         | protein_coding       |
| ENSG00000164442.8  | 6,69E-05    | CITED2        | protein_coding       |
| ENSG00000198856.8  | 7,26E-05    | OSTC          | protein_coding       |
| ENSG00000211721.2  | 7,26E-05    | TRBV6-5       | TR_V_gene            |
| ENSG00000144909.7  | 8,53E-05    | OSBPL11       | protein_coding       |
| ENSG00000115137.7  | 0,000118722 | DNAJC27       | protein_coding       |
| ENSG00000211779.3  | 0,000123508 | TRAV5         | TR_V_gene            |
| ENSG00000211845.1  | 0,000137091 | TRAJ44        | TR_J_gene            |
| ENSG00000239713.3  | 0,000140183 | APOBEC3G      | protein_coding       |
| ENSG00000130684.9  | 0,000142311 | ZNF337        | protein_coding       |
| ENSG00000100462.11 | 0,000146686 | PRMT5         | protein_coding       |
| ENSG00000266913.1  | 0,000151864 | CTC-548K16.2  | lincRNA              |
| ENSG00000019582.10 | 0,000159286 | CD74          | protein_coding       |
| ENSG00000260588.1  | 0,000170805 | RP11-930P14.2 | lincRNA              |
| ENSG00000088888.13 | 0,000170805 | MAVS          | protein_coding       |
| ENSG00000205940.7  | 0,000176699 | HSP90AB2P     | pseudogene           |
| ENSG00000152268.8  | 0,000176915 | SPON1         | processed_transcript |
| ENSG00000105135.11 | 0,000176915 | ILVBL         | protein_coding       |
| ENSG00000160949.12 | 0,000216376 | TONSL         | protein_coding       |
| ENSG00000100994.7  | 0,000217593 | PYGB          | protein_coding       |
| ENSG00000224977.1  | 0,000291373 | RP11-160H22.3 | lincRNA              |
| ENSG00000138600.5  | 0,000310902 | SPPL2A        | protein_coding       |
| ENSG00000110987.4  | 0,000322217 | BCL7A         | protein_coding       |
| ENSG00000261840.1  | 0,000346766 | RP11-146F11.1 | antisense            |
| ENSG00000196151.6  | 0,000422885 | WDSUB1        | protein_coding       |
| ENSG00000105011.4  | 0,000422885 | ASF1B         | protein_coding       |
| ENSG00000249896.1  | 0,000440611 | RP11-586D19.1 | lincRNA              |
| ENSG00000146677.6  | 0,000440611 | AC004453.8    | pseudogene           |
| ENSG00000269305.1  | 0,000440611 | AL158147.2    | protein_coding       |
| ENSG00000104866.6  | 0,00047304  | PPP1R37       | protein_coding       |



|                    |             |               |                      |
|--------------------|-------------|---------------|----------------------|
| ENSG00000177542.6  | 0,000480918 | SLC25A22      | protein_coding       |
| ENSG00000142669.9  | 0,000513721 | SH3BGRL3      | protein_coding       |
| ENSG00000242659.1  | 0,000599389 | RP11-271C24.2 | lincRNA              |
| ENSG00000140876.7  | 0,000624285 | NUDT7         | protein_coding       |
| ENSG00000026025.9  | 0,000677219 | VIM           | protein_coding       |
| ENSG00000078114.14 | 0,000702064 | NEBL          | protein_coding       |
| ENSG00000179455.6  | 0,000702456 | MKRN3         | protein_coding       |
| ENSG00000104783.7  | 0,000703425 | KCNN4         | protein_coding       |
| ENSG00000161956.8  | 0,000717622 | SENP3         | protein_coding       |
| ENSG00000116251.5  | 0,000718076 | RPL22         | protein_coding       |
| ENSG00000060138.8  | 0,000784997 | YBX3          | protein_coding       |
| ENSG00000170579.10 | 0,000829424 | DLGAP1        | protein_coding       |
| ENSG00000171302.12 | 0,000836714 | CANT1         | protein_coding       |
| ENSG00000179761.7  | 0,000837709 | PIPOX         | protein_coding       |
| ENSG00000234737.1  | 0,0008558   | KRT18P15      | pseudogene           |
| ENSG00000090104.7  | 0,000870023 | RGS1          | protein_coding       |
| ENSG00000151229.8  | 0,000870023 | SLC2A13       | protein_coding       |
| ENSG00000230433.1  | 0,000903607 | RP1-20B11.2   | antisense            |
| ENSG00000259453.1  | 0,000903607 | RP11-815J21.1 | sense_intronic       |
| ENSG00000106086.14 | 0,000942811 | PLEKHA8       | protein_coding       |
| ENSG00000183087.10 | 0,001041989 | GAS6          | protein_coding       |
| ENSG00000099284.9  | 0,001067938 | H2AFY2        | protein_coding       |
| ENSG00000211801.3  | 0,00108732  | TRAV21        | TR_V_gene            |
| ENSG00000048140.13 | 0,001112009 | TSPAN17       | protein_coding       |
| ENSG00000259658.3  | 0,001112009 | RP11-89K11.1  | protein_coding       |
| ENSG00000138385.11 | 0,001142215 | SSB           | protein_coding       |
| ENSG00000176890.11 | 0,001142215 | TYMS          | protein_coding       |
| ENSG00000130024.10 | 0,001260334 | PHF10         | protein_coding       |
| ENSG00000081665.9  | 0,001260334 | ZNF506        | protein_coding       |
| ENSG00000227124.4  | 0,001346977 | ZNF717        | protein_coding       |
| ENSG00000196421.3  | 0,001346977 | LINC00176     | lincRNA              |
| ENSG00000156234.7  | 0,001407139 | CXCL13        | protein_coding       |
| ENSG00000263813.1  | 0,00146221  | MIR3679       | miRNA                |
| ENSG00000159712.10 | 0,001503026 | ANKRD18CP     | pseudogene           |
| ENSG00000196176.7  | 0,001533323 | HIST1H4A      | protein_coding       |
| ENSG00000112486.10 | 0,001533323 | CCR6          | protein_coding       |
| ENSG00000153363.8  | 0,001727437 | LINC00467     | processed_transcript |
| ENSG00000164056.6  | 0,001923455 | SPRY1         | protein_coding       |
| ENSG00000227507.2  | 0,001962864 | LTB           | protein_coding       |
| ENSG00000167447.8  | 0,00197187  | SMG8          | protein_coding       |
| ENSG00000103269.9  | 0,002182382 | RHBDL1        | protein_coding       |
| ENSG00000228399.1  | 0,002381987 | RP4-575N6.2   | pseudogene           |

|                    |             |               |                      |
|--------------------|-------------|---------------|----------------------|
| ENSG00000185085.2  | 0,002527354 | INTS5         | protein_coding       |
| ENSG00000133641.13 | 0,00266273  | C12orf29      | protein_coding       |
| ENSG00000227705.1  | 0,00266273  | RP11-15M15.2  | antisense            |
| ENSG00000260360.1  | 0,002775173 | RP11-533E19.5 | lincRNA              |
| ENSG00000231062.1  | 0,002775173 | AC103563.9    | antisense            |
| ENSG00000182541.13 | 0,003140982 | LIMK2         | protein_coding       |
| ENSG00000258458.1  | 0,003243211 | CTD-2555K7.2  | processed_transcript |
| ENSG00000264462.1  | 0,003243211 | MIR3648       | miRNA                |
| ENSG00000093009.5  | 0,003243211 | CDC45         | protein_coding       |
| ENSG00000211874.1  | 0,003318314 | TRAJ15        | TR_J_pseudogene      |
| ENSG00000173281.4  | 0,003377701 | PPP1R3B       | protein_coding       |
| ENSG00000219928.2  | 0,00342406  | RP11-40C6.2   | pseudogene           |
| ENSG00000149809.10 | 0,003495985 | TM7SF2        | protein_coding       |
| ENSG00000144407.5  | 0,003507691 | PTH2R         | protein_coding       |
| ENSG00000124205.11 | 0,003670829 | EDN3          | protein_coding       |
| ENSG00000228509.1  | 0,003703159 | AC006460.2    | antisense            |
| ENSG00000206560.6  | 0,003703159 | ANKRD28       | protein_coding       |
| ENSG00000174327.6  | 0,003846575 | SLC16A13      | protein_coding       |
| ENSG00000111796.3  | 0,004157413 | KLRB1         | protein_coding       |
| ENSG00000235532.1  | 0,004157413 | LINC00402     | lincRNA              |
| ENSG00000099139.9  | 0,004160848 | PCSK5         | protein_coding       |
| ENSG00000154451.10 | 0,004364036 | GBP5          | protein_coding       |
| ENSG00000113369.4  | 0,004391783 | ARRDC3        | protein_coding       |
| ENSG00000002586.13 | 0,004421674 | CD99          | protein_coding       |
| ENSG00000112029.5  | 0,004582599 | FBXO5         | protein_coding       |
| ENSG00000230091.2  | 0,004582599 | TMEM254-AS1   | antisense            |
| ENSG00000273199.1  | 0,004582599 | AP000692.10   | antisense            |
| ENSG00000117594.5  | 0,004711941 | HSD11B1       | protein_coding       |
| ENSG00000081377.12 | 0,004711941 | CDC14B        | protein_coding       |
| ENSG00000149289.6  | 0,004711941 | ZC3H12C       | protein_coding       |
| ENSG00000089685.10 | 0,005099005 | BIRC5         | protein_coding       |
| ENSG00000197959.9  | 0,005232819 | DNM3          | protein_coding       |
| ENSG00000207688.2  | 0,005232819 | MIR548AA2     | miRNA                |
| ENSG00000260816.1  | 0,005300933 | RP11-319G9.3  | sense_intronic       |
| ENSG00000235522.2  | 0,005615783 | AC009505.2    | antisense            |
| ENSG00000105963.9  | 0,005678775 | ADAP1         | protein_coding       |
| ENSG00000123689.5  | 0,005815133 | G0S2          | protein_coding       |
| ENSG00000169413.2  | 0,005941008 | RNASE6        | protein_coding       |
| ENSG00000270066.2  | 0,006345247 | SCARNA2       | lincRNA              |
| ENSG00000211710.3  | 0,006345247 | TRBV4-1       | TR_V_gene            |
| ENSG00000212420.1  | 0,006345247 | RNU6-1111P    | snRNA                |
| ENSG00000230897.1  | 0,006501257 | RPS18P12      | pseudogene           |

|                    |             |              |                |
|--------------------|-------------|--------------|----------------|
| ENSG00000165929.8  | 0,006529434 | TC2N         | protein_coding |
| ENSG00000153048.6  | 0,006625776 | CARHSP1      | protein_coding |
| ENSG00000141485.11 | 0,007382815 | SLC13A5      | protein_coding |
| ENSG00000248932.1  | 0,007559661 | RP11-319G6.1 | antisense      |
| ENSG00000215271.6  | 0,007837319 | HOMEZ        | protein_coding |
| ENSG00000237263.1  | 0,007902758 | MAPK6PS3     | pseudogene     |
| ENSG00000071054.11 | 0,007917631 | MAP4K4       | protein_coding |
| ENSG00000198646.9  | 0,007917631 | NCOA6        | protein_coding |
| ENSG00000166200.10 | 0,00797298  | COPS2        | protein_coding |
| ENSG00000174428.12 | 0,008188201 | GTF2IRD2B    | protein_coding |
| ENSG00000229585.4  | 0,00818825  | RPL21P44     | pseudogene     |
| ENSG00000061936.5  | 0,008543382 | SFSWAP       | protein_coding |
| ENSG00000107779.7  | 0,008851792 | BMPR1A       | protein_coding |
| ENSG00000214359.3  | 0,008958437 | RPL18P10     | pseudogene     |
| ENSG00000143153.8  | 0,009141615 | ATP1B1       | protein_coding |
| ENSG00000184661.9  | 0,00929477  | CDCA2        | protein_coding |
| ENSG00000265624.1  | 0,009318662 | RN7SL166P    | misc_RNA       |
| ENSG00000266640.1  | 0,009318662 | MIR4754      | miRNA          |
| ENSG00000271398.1  | 0,009362421 | RP5-1092A3.5 | lincRNA        |
| ENSG00000101745.11 | 0,009362421 | ANKRD12      | protein_coding |
| ENSG00000146670.5  | 0,009392716 | CDCA5        | protein_coding |
| ENSG00000206737.1  | 0,009548828 | RNVU1-18     | snRNA          |
| ENSG00000127946.12 | 0,009548828 | HIP1         | protein_coding |
| ENSG00000240509.1  | 0,00955579  | RPL34P18     | pseudogene     |
| ENSG00000178075.15 | 0,009626761 | GRAMD1C      | protein_coding |
| ENSG00000163877.9  | 0,009642843 | SNIP1        | protein_coding |
| ENSG00000269927.1  | 0,009642843 | RP6-91H8.3   | lincRNA        |
| ENSG00000250011.1  | 0,009934935 | HMGB1P3      | pseudogene     |
| ENSG00000173218.10 | 0,009953918 | VANGL1       | protein_coding |
| ENSG00000213613.2  | 0,009953918 | RP11-380G5.3 | pseudogene     |
| ENSG00000139734.13 | 0,009953918 | DIAPH3       | protein_coding |

84

85

86 **Supplemental Table 6: Number of RNAseq reads assigned to each gene (gencode v19)**  
87 **for each sample.**

88 Individual Excel File attached.

89

90

- 91 **Supplemental Table 7: RNAseq quality control metrics called by RNAseQC and**  
92 **samtools flagstat.**
- 93 Individual Excel File attached.

Supplemental Figure 1

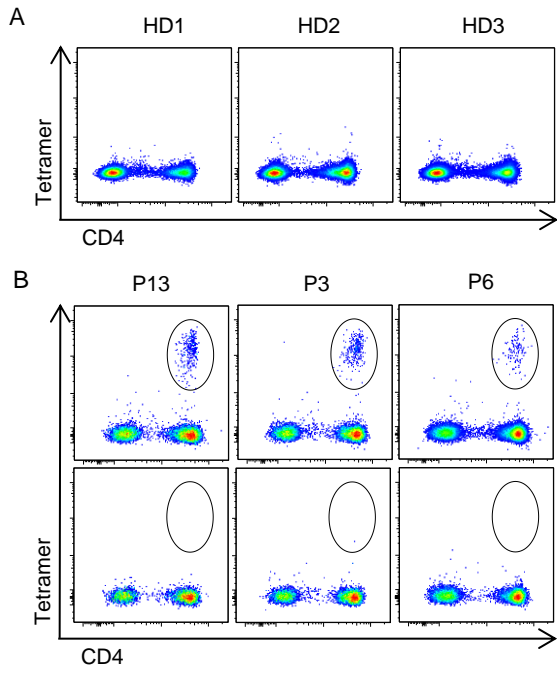

Supplemental Figure 2

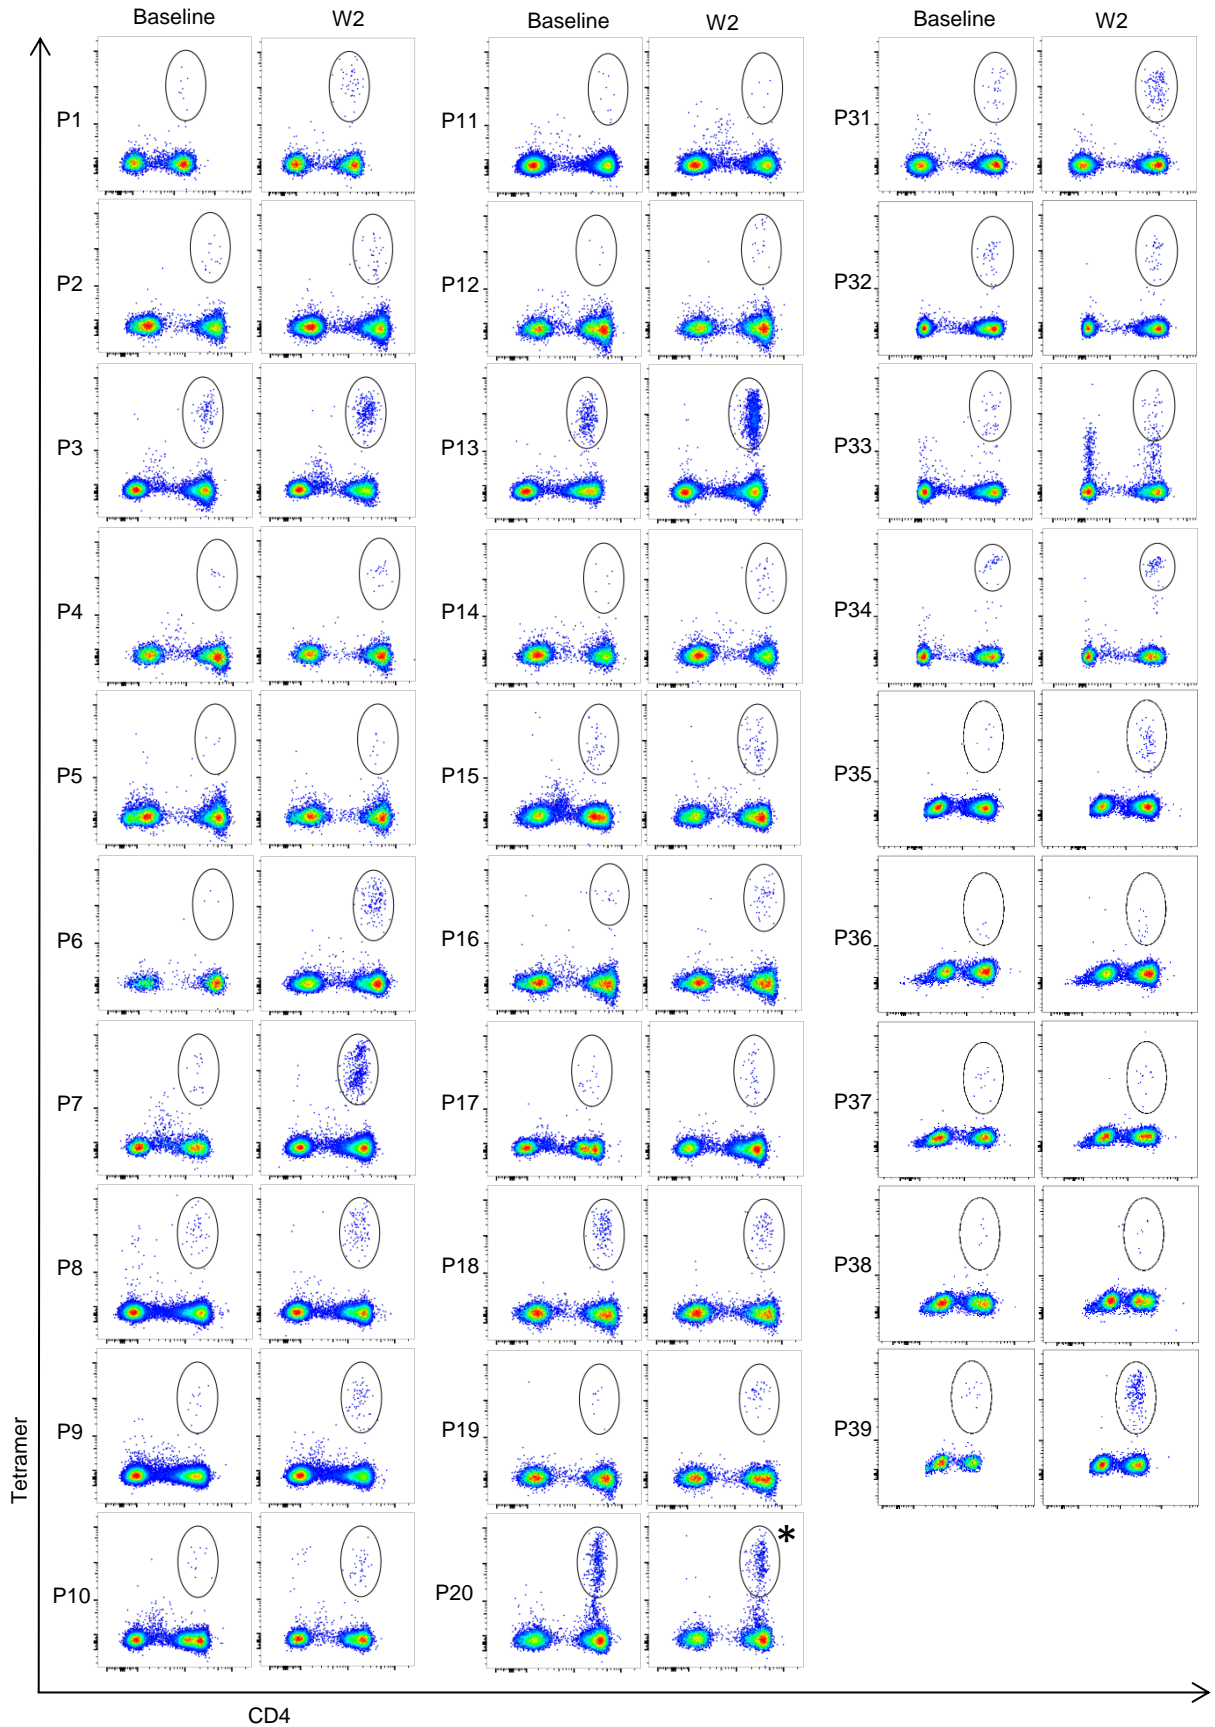

Supplemental Figure 3

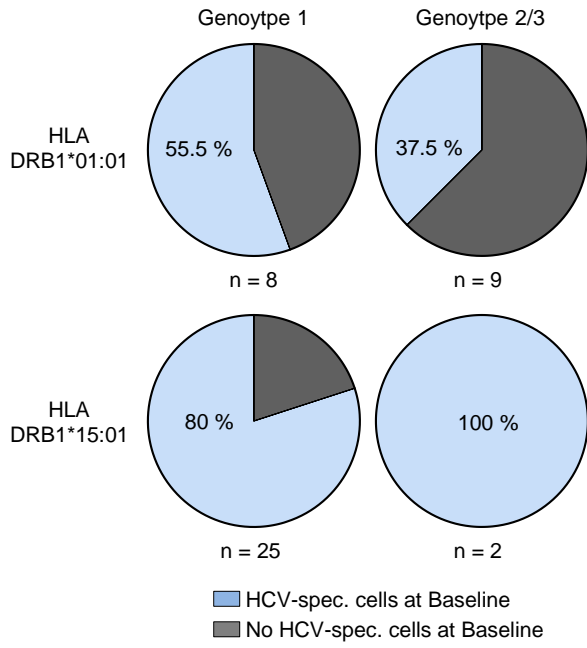

Supplemental Figure 4

A

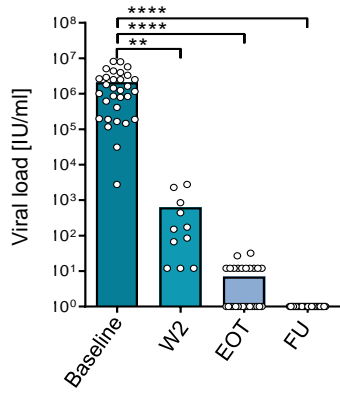

B

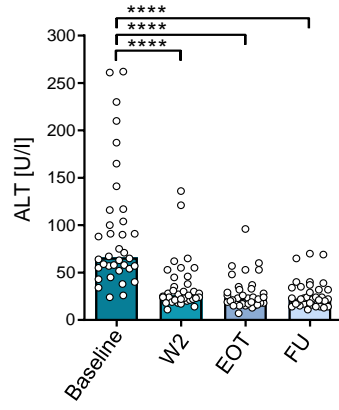



Supplemental Figure 5

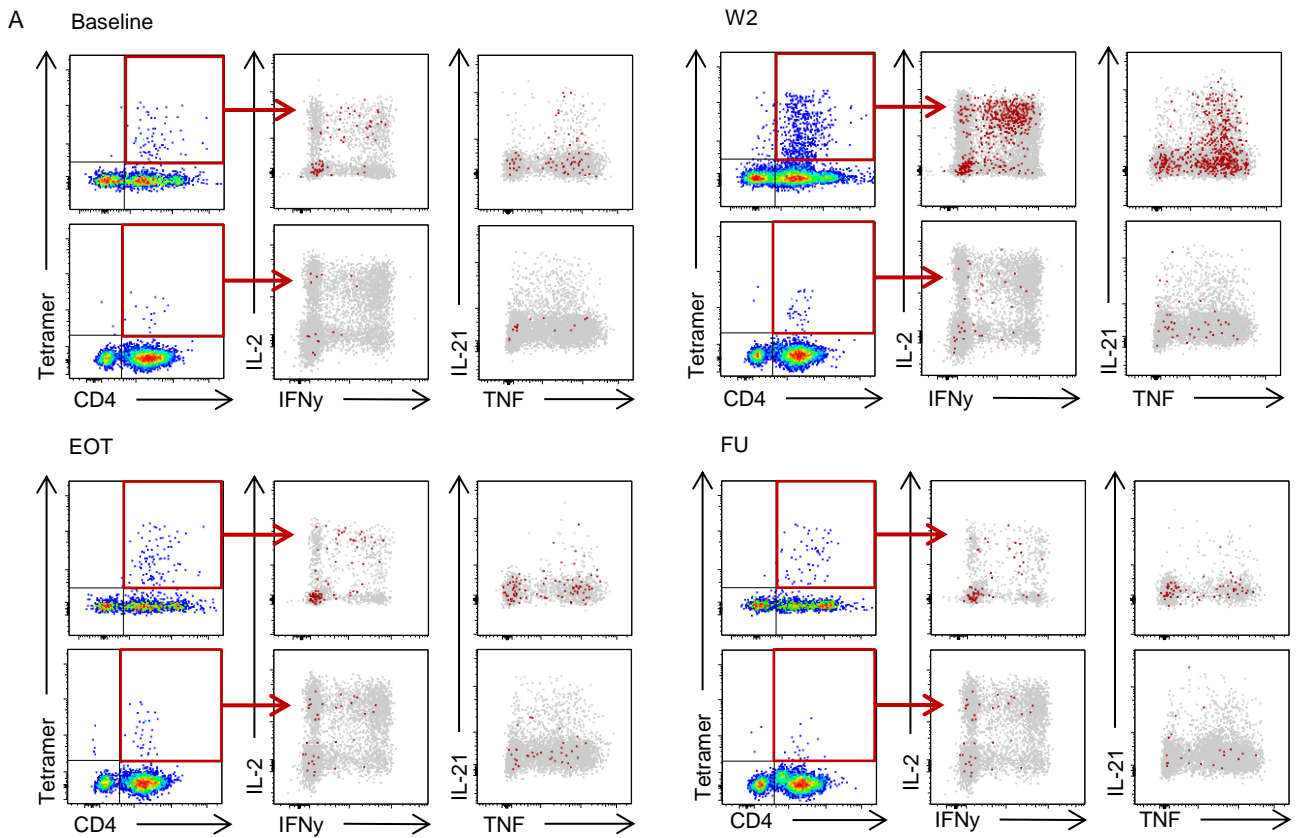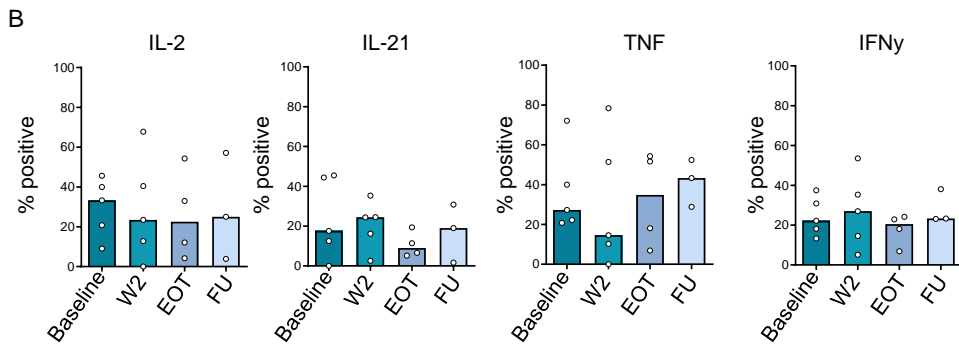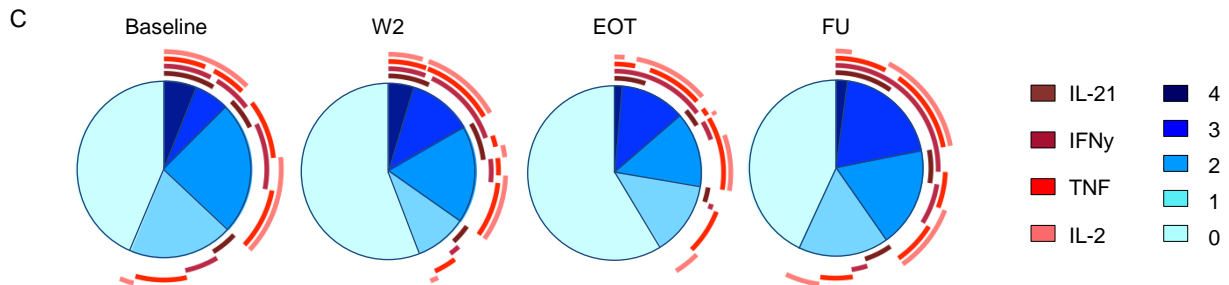

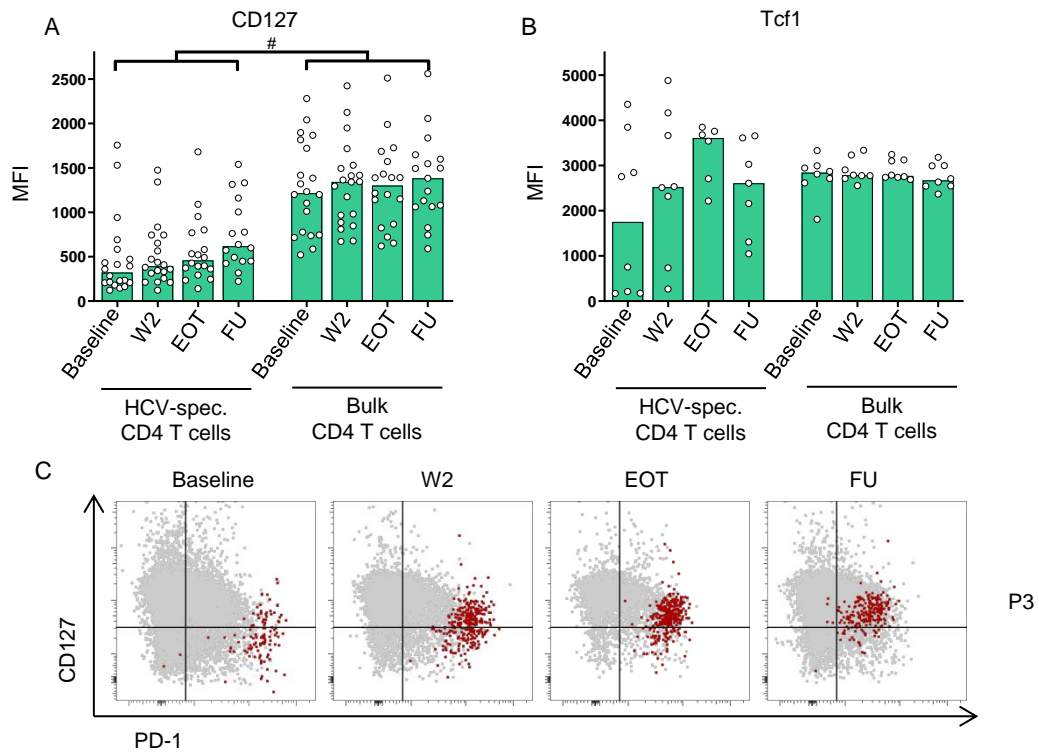

Supplemental Figure 7

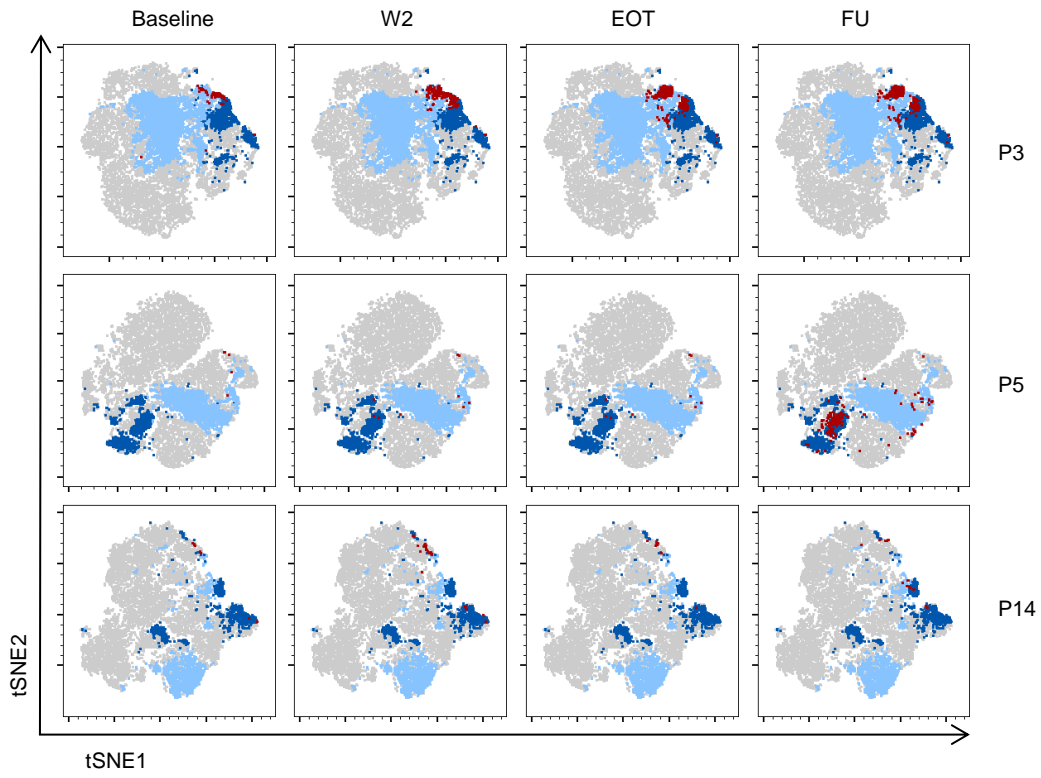

Supplemental Figure 8

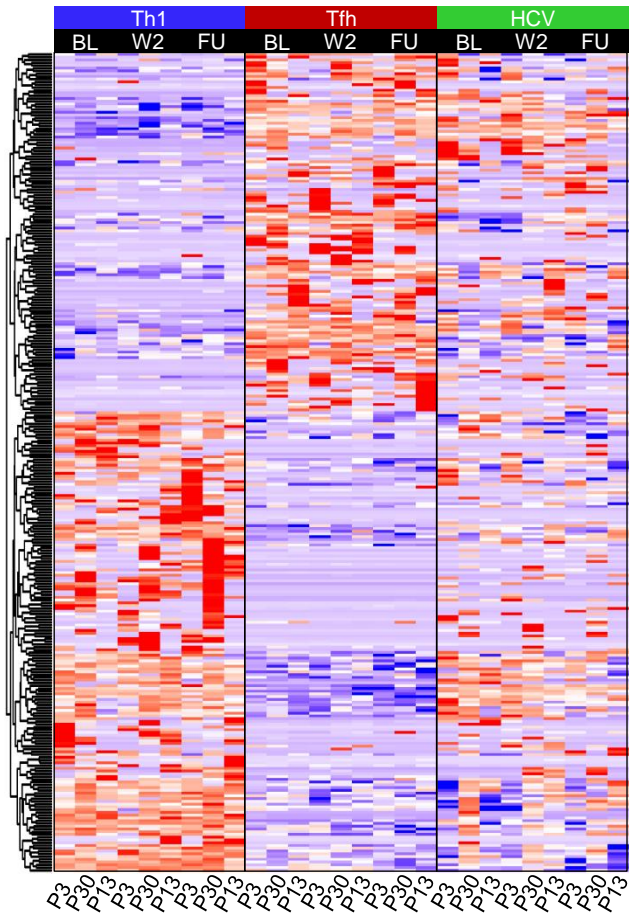

Supplement: jci-130-129642-s351.pdf [file jci-130-129642-s351.pdf]
